# Supplementary material
Source: MDPI journal article supplement (https://www.mdpi.com/2073-4344/11/10/1184)
Supplement: s1 [file s1]

## Supplementary Materials

# Efficient 1-hydroxy-2-butanone production from 1,2-butanediol by whole cells of engineered *E. coli*

Hui Lin<sup>1,†</sup>, Jiayin Xu<sup>2,†</sup>, Wenlian Sun<sup>1</sup>, Wujia Hu<sup>1</sup>, Huifang Gao<sup>1</sup>, Kaihui Hu<sup>1</sup>, Junzhi Qiu<sup>1</sup>,

Binbin Huang<sup>3,\*</sup>, Liaoyuan Zhang<sup>1,\*</sup>

<sup>1</sup>Key Laboratory of Biopesticide and Chemical Biology, Ministry of Education, College of Life Sciences, Fujian Agriculture and Forestry University, Fuzhou, Fujian 350002, PR China

1028600689@qq.com (H.L.); 1628499880@qq.com (W.S.); 2106140138@qq.com (W.H.); 1365677053@qq.com (H.G.); 764209425@qq.com (K.H.); 229127162@qq.com (J.Q.); zliaoyuan@126.com (L.Z.)

<sup>2</sup>Department of pharmacy, the First Affiliated Hospital of Xiamen University, Xiamen, Fujian 361022, PR China

36189787@qq.com (J.X.)

<sup>3</sup>College of Plant Protection, Fujian Agriculture and Forestry University, Fuzhou, Fujian 350002, PR China  
bbhuang@fafu.edu.cn (B.H.)

\*Correspondence: bbhuang@fafu.edu.cn (B.H.); zliaoyuan@126.com (L.Z.);

Tel.: +86-591-83789492 (L.Z.); Fax: +86-591-83789121 (L.Z.)

† These authors contributed equally to this work.

**Table S1.** The primers used in this study.

| Primers       | Sequences                                                       | Source          |
|---------------|-----------------------------------------------------------------|-----------------|
| SSBDH-F       | CAGCAAATGGGTCGC <u>GGATCC</u> ATGTCGACAGGTTTGAACG               | <i>Bam</i> HI   |
| SSBDH-R       | CTCGAGTGC GGCCGCA <u>AAGCTT</u> TTAACGATAAACCCAGCCCG            | <i>Hind</i> III |
| mBDH-F        | CAGCAAATGGGTCGC <u>GGATCC</u> ATGCGTTTCGACAATAAAAGT             | <i>Bam</i> HI   |
| mBDH-F        | CTCGAGTGC GGCCGCA <u>AAGCTT</u> TCAAACGATCTTCGGTTGAC            | <i>Hind</i> III |
| RRBDH-F       | CAGCAAATGGGTCGC <u>GGATCC</u> ATGGTTAATTTCAAGGGGAA              | <i>Bam</i> HI   |
| RRBDH-R       | CTCGAGTGC GGCCGCA <u>AAGCTT</u> TTACTGCGGTGGACGCACCA            | <i>Hind</i> III |
| GDH-F         | CAGCAAATGGGTCGC <u>GGATCC</u> ATGTTGAGAATCATCCAGTC              | <i>Bam</i> HI   |
| GDH-R         | CTCGAGTGC GGCCGCA <u>AAGCTT</u> TCAGCGTTGGTGTGTGCA              | <i>Hind</i> III |
| CaADH:S199A-F | GTGTTGGAGCAAGACCTGTTTGTGTTG                                     |                 |
| CaADH:S199A-R | ACAGGTCTC <u>GT</u> TCCAACACCGATAATT                            |                 |
| P1            | CAGCAAATGGGTCGC <u>GGATCC</u> ATGGTTAATTTCAAGGGGAA              | <i>Bam</i> HI   |
| P2            | <u>GGTTCCACCTCCTAAGAAAACGATCGCCGGGGTTACTGCGG</u><br>TGGACGCACCA | RBS sequence    |
| P3            | <u>CCCCGGCGATCGTTTTCTTAGGAGGTGGAACCATGAAAGTC</u><br>ACAGTTGTTGG | RBS sequence    |
| P4            | TCGAGTGC GGCCGCA <u>AAGCTT</u> TTAAGCGTTAACTGATTGGG             | <i>Hind</i> III |
| P5            | CAGCAAATGGGTCGC <u>GGATCC</u> ATGGTTAATTTCAAGGGGAA              | <i>Bam</i> HI   |
| P6            | <u>GGTTCCACCTCCTAAGAAAACGATCGCCGGGGTTACTGCGG</u><br>TGGACGCACCA | RBS sequence    |
| P7            | <u>CCCCGGCGATCGTTTTCTTAGGAGGTGGAACCATGAAAGTC</u><br>ACAGTTGTTGG | RBS sequence    |
| P8            | <u>TAAGAAAACGATCGCCGGGGTTAAGCGTTAACTGATTGGG</u>                 | RBS sequence    |
| P9            | <u>CCCCGGCGATCGTTTTCTTAGGAGGTGGAACCATGTTAGAC</u><br>CAGCAAACCAT | RBS sequence    |
| P10           | TCGAGTGC GGCCGCA <u>AAGCTT</u> TTATTCAACCGCTTGAGCGT             | <i>Hind</i> III |
| P11           | CAGCAAATGGGTCGC <u>GGATCC</u> ATGGTTAATTTCAAGGGGAA              | <i>Bam</i> HI   |
| P12           | <u>GGTTCCACCTCCTAAGAAAACGATCGCCGGGGTTACTGCGG</u><br>TGGACGCACCA | RBS sequence    |
| P13           | <u>CCCCGGCGATCGTTTTCTTAGGAGGTGGAACCATGAAAGTC</u><br>ACAGTTGTTGG | RBS sequence    |
| P14           | TCGAGTGC GGCCGCA <u>AAGCTT</u> TTAAGCGTTAACTGATTGGG             | <i>Hind</i> III |
| P15           | CAGCAAATGGGTCGC <u>GGATCC</u> ATGGTTAATTTCAAGGGGAA              | <i>Bam</i> HI   |
| P16           | <u>GGTTCCACCTCCTAAGAAAACGATCGCCGGGGTTACTGCGG</u><br>TGGACGCACCA | RBS sequence    |
| P17           | <u>CCCCGGCGATCGTTTTCTTAGGAGGTGGAACCATGAAAGTC</u><br>ACAGTTGTTGG | RBS sequence    |
| P18           | <u>TAAGAAAACGATCGCCGGGGTTAAGCGTTAACTGATTGGG</u>                 | RBS sequence    |
| P19           | <u>CCCCGGCGATCGTTTTCTTAGGAGGTGGAACCATGTTAGAC</u><br>CAGCAAACCAT | RBS sequence    |
| P20           | TCGAGTGC GGCCGCA <u>AAGCTT</u> TTATTCAACCGCTTGAGCGT             | <i>Hind</i> III |

**Table S2.** Sequence information of the genes used in this study.

| Gene name    | Sequence                                                                                                                                                                                                                                                                                                                                                                                                                                                                                                                                                                                                                                                                                                                                                                                                                                                                                                                                                                                                                                                                                                                                                           |
|--------------|--------------------------------------------------------------------------------------------------------------------------------------------------------------------------------------------------------------------------------------------------------------------------------------------------------------------------------------------------------------------------------------------------------------------------------------------------------------------------------------------------------------------------------------------------------------------------------------------------------------------------------------------------------------------------------------------------------------------------------------------------------------------------------------------------------------------------------------------------------------------------------------------------------------------------------------------------------------------------------------------------------------------------------------------------------------------------------------------------------------------------------------------------------------------|
| <i>ssbdh</i> | <p>ATGTCGACAGGTTTGAACGGAAAGGTAGCCATTATCACTGGCGCTGCGCGTGG<br/> CATTGGCCGGGGATCGCACTGCGCCTGGCACAAGAGGGGTCAACCTTGCGC<br/> TCTTGATTTATCCGCAGATCAGCTTGGTATAGTCAGGAAAGAGGTGGAGTCTT<br/> TCGGGGTAAAAGCGACAACCTACGTTGCCGATATCAGCAAGCGCGAGGAGGT<br/> GTATGCGGCCATCGAGCACGTTGTGAGTACGCTGGGTACCTTGATGTGATGAT<br/> TAATAACGCCGGCATTTCGCAGGTAAAACCCATCGCAGACGTGGTGCCGGAAG<br/> ATCTTGAGAAGATCCTGAACATCAATATCGGGGGGTGACCTGGGGGATCCAG<br/> GCCGCCGCGGCGAAATTTAAACAGCTCAACAAAAACGGCAAGATCATCAATG<br/> CTTGTTCCATCGCCGGTCACGAGGGTTTTGCATTGCTGGGCGTGTACTCCGCCAC<br/> CAAATTCGCCGTACGCGCATTGACCCAGGTTGCGGCCAAGGAATACGCCAGCG<br/> ACAACATTACCGTCAACGCCTATTGCCCTGGAGTGGTCGGCACCGATATGTGG<br/> GTGGAATAGATCAGCGTTTCTCGGAGATTACCGGTGCGCCGAAAGGTGAAAC<br/> CTATAAGAAGTACGTTGATGGCATTGCCTTGGGGCGCGCACAAACCCGGCTG<br/> ACGTCGCGGCACTTGTCGCTTTTCTTTCCAGCGACGACGCTGCCTATATACCG<br/> GTCAGTCGATTTTGACCGACGGCGGGCTGGTTTATCGTTAA</p>                                                                                                                                                                                                                                                              |
| <i>mbdh</i>  | <p>ATGCGTTTCGACAATAAAGTGGTAGTGATCACCGGCGCAGGCAATGGGATGGG<br/> GGAAGCGGCAGCACGCCGATTCTCCGCCGAGGGCGCCGTGGTGGTGCTGGCGG<br/> ACTGGGCGAAGGATGCGGTAGATGCCGTTGCCGCTCGCTGCCGAAAGGCAGG<br/> GCGCTGGCGGTACACATCGACGTTTCCGACCCGTTGCGGTTGAAAAATGAT<br/> GAACGAGGTGGCGGCAAACTGGGCCGCATCGACGTGTTGCTGAACAATGCCG<br/> GCGTGACGTGGCGGGTACAGTGCTGGAAACCAGCGTGGCCGACTGGCGGCGC<br/> ATCGCTGGGGTGGATATCGACGGCGTAGTGTTCTGTTCCAAATTCGCCATGCCT<br/> TATTTGCTGAAAACCAAGGGCTGTATCGTTAACACCGCCTCGGTATCCGGCCTG<br/> GGTGGCGACTGGGGCGCGGCATATTACTGCGCGGCGAAAGGGGCGGTGGTCA<br/> ACCTGACGCGCGCCATGGCGCTGGATCACGGCGGTGACGGCGTGCGCGTGAAC<br/> TCGGTGTGCCCGAGCCTGGTGAAAACCAATATGACCAATGGTTGGCCGCAAGA<br/> GATCCGCGACAAGTTCAACGAGCGCATTGCGTTGGGGCGTGCGGCAGAGCCGG<br/> AAGAAGTGGCGGCGGTAATGGCGTTTCTGGCCAGCGACGACGCCAGCTTTATC<br/> AACGGCGCCAACATCCCGGTTGACGGCGGCGCGACCGCATCAGACGGTCAAC<br/> CGAAGATCGTTTGA</p>                                                                                                                                                                                                                                                                                         |
| <i>rrbdh</i> | <p>ATGGTTAATTTCAAGGGGAAGATGATGAAAGCAGCTCGTTGGTATCAGGCGCG<br/> CGACATCCGTATTGATGATATTGAAGAACCTCAGGTTTCCGCCGGTAAGGTGAA<br/> AATCAAGGTAGCCTGGACCGGAATTTGCGGCAGCGACCTGCACGAATACCTCG<br/> CCGGACCGATTTTGGCCCGGTAGGCAACCTCACAAGCTAAGCCATGACATC<br/> GCGCTATCGTCATGGGCCATGAGTTTTCCGGTGAAGTGGTAGACGTGGGTGCG<br/> GGCGTGACGAAATTCAAAGCCGGTGACCGCGTGGTCGTAGAGCCGATCCTGGC<br/> TTGTGCTCAGTGCGAAGCCTGCCGCGAAGGCAAATATAACCTGTGCGCCGATC<br/> TGGGTTTCCACGGTCTGTCCGGCGGTGGCGGCGGCTTCTCCTCCTTTACCATGGT<br/> AGACGAGCATATGGTACACCGCATGCCCGATGCGCTCAGCTATGAGCAAAGGTG<br/> CGTTGGTAGAACCTGCGGCGGTAGCCCTTCATGCGGTGCGGATGAGCAAATTG<br/> AAAGCCGGGGATAAAGCGGCCGTCTTCGGTGCCGGCCCCATCGGCCTGCTGGT<br/> GATTGAAGCACTGCGCGCGGCCGGTGCGGCAGAAATTTATGTGGTCGAGCTGT<br/> CACCTCAGCGGGCAGAAAAAGCGCGCGAACTGGGGGCGAAAGTGGTGATCGA<br/> CCCCAGCAAAGACGATGCCGTGCCACAATAACGCGAGCTGAGCGCGGGTGGC<br/> GTTGACGTAGCGTTTGAAGTGACCGCGGTGCCGGTGGTGCTAAAACAGTGAT<br/> CGACAGCACTCGCTACGAAGGCGAGACGATTATCGTCTCCATCTGGGAAGGGG<br/> AAGCGGCATTCCATCCGAACAAAGTGGTGCTCAGCGAACGTTCAAGTCAAAGGG<br/> ATTATCGCTTATCGCCATATTTTCCGGCGGTGATGGATCTGATGACCCAGGGC<br/> TACTTCCAGGCCGACAAGCTGGTGACCAAACGTATCGAACTGGCTGATTGGTG</p> |

---

GAGCAGGGTTTTGAAGCGCTGGTGAAAGAAAAACAACAGGTTAAAATCCTGGT  
GCGTCCACCGCAGTAA

*gdh*

ATGTTGAGAATCATCCAGTCTCCAGGCAAGTACATTAGGGGCGCCAATGCGTTG  
GTCGCCGTGGGCCAATACGCTAAAGCGCTTGCCGACCATTATTTCTGATTGCC  
GACGACTTCGTCATGAAGCTGGCGGGCGATACCCTGATGGGCAGCCTGCAACA  
GCACGGGGTGAAACATCACGCCTGCCTGTTCAACGGCGAATGCTGCCATAAGG  
AAATCGACCGGTTGGGGCGCGAACTGAAGGCCCATGGCTGTGCGGGCGTGATT  
GGCGTCGGCGGCGGCAAAACCCTCGATACCGCCAAAGCCATCGCGCACTACCA  
GCAATTGCCGGTCGTGTTAATTCACCATTGCTTCCACCGATGCGCCGACCAG  
CGCGCTGTGCGGTGATCTACACCGAACAGGGCGAATTTGCCGAGTACCTGATCT  
ACCCGCGCAACCCGGATATGGTGGTGATGGACAGCGCGATTATCGCCAAGGCG  
CCTGTGCGCCTGTTGGTCGCGGGAATGGGCGATGCGCTTTCACCTATTTTGAG  
GCGCAGGCCTGTTTCGACGCTCAGGCAACCAGCATGGCGGGCGGCAAATCGAC  
GCTGGCGGCGCTCAGCCTGGCGCGACTGTGCTATGAGACGCTGCTGGCAGAAG  
GCGTCAAAGCCAACTGGCGGTTGAGGCCGGCGTGTTGACGGAAGCGGTCTGA  
GCGCATTATCGAGGCCAATACCTACCTGAGCGGCATTGGTTTTGAAAGCAGCG  
GGCTGGCGGCGGCGCACGCTATTCACAACGGTTTCACCGTGCTGGAAGAGTGC  
CATCACCTGTACCACGGCGAGAAAGTGGCTTTCGGCACGCTAGCGCAACTGGT  
GCTGCAAAACAGCAGCATGGCGCAGATCGAAACGGTGCTGGATTTCTGCCACC  
GCATCGGCTTGCTGTCACTGGCCGAGATGGGCGTTAGCGGCGATGCGGCA  
GAGAAAATCATGGCGGTTGCCAAGCCAGCTGCGCCGCCGGCGAAACCATCC  
ACAACATGCCGTTCAAGGTGACGCCGGCCAGCGTGACGGCTGCAATCTTGACG  
GCCGATCGGCTGGGCAGTGCCTGGCTGCAACAACACCAACGCTGA

*Cbadh*

ATGAAAGCAGCATTATGGTATGCAAAGAAAGATGTTAGAGTAGAGGAAATTG  
AAGAACCTAAAGTTACAGTTAATGGTGTAAGATTAAAGTAAAATGGTGTGGA  
ATATGTGGATCAGATTTACATGAATATTTAGGAGGACCTATATTTATACCAGTA  
GGACAACCTCACCCATTAAGTGGTACAACCTGCTCCAGTAGTTCTAGGACATGA  
ATTTTCAGGAGATGTCGTTGAAGTTGGTCCTAATGTAAAGAATTTTAAACCAGG  
AGATAGAGTAATAGTTGAACCTATAGTTGCATGTGGAATAATGTCCAGCGTGCTT  
AGAAGGAAAATATAATTTATGTTTCATCATTAGGTTTCCATGGACTTTGCGGAAG  
TGGTGGAGGACTTGCTGAATATACAGTTTTCCAGAGAATAATCGTACATAAGAT  
TCCAGATGAAATGTCTTACGAACAAGCTGCTTTAGTTGAGCCAATGGCAGTAGC  
ATTACATTCAATTAGAATTGGTAATTTTAGAACAGGGGATACTGCGTTAGTACT  
AGGATCTGGTCCAATAGGACTAGCAACTATTGAGTGCTTAAAGCAGCCGGTG  
CAAAATTAATAATAGTATTACAAAGAAAATCTATAAGACAAGAGTATGCTAAA  
AGAGCAGGGGCAGATGTAGTATTAGATCCTAATGAAGTAAATATAGCAGAGG  
AAGTTAAGAAGCTTACTAACGGATTAGGAGTTGACGTGGCGTTTGAAACTACA  
GGAGCTCAAATAGGTTTTGATACAGGTATAGATAGCTTAAAGTTTGAAAGGAAC  
TTTAGTTGTAAGTATGATATGGGAAAATGATGTTAAATTTAATCCTAATGTATTA  
GTATTCATGAGAAGAAAATCATTGGAACATTAGCATACAGACATGAATTCCC  
AGCAACTATGGCTCAAATGAAAGATGGAAGAATAAAAGCAGAAGGATATGTA  
ACAAAGAAAATACATTTAGATGATATAGTTGAAGAAGGGTTTGAGCATTAAAC  
AGGTCCAGAAAAGAAGAAACATGTTAAGATATTAGTATCTCCAGACAAAGAA  
CTTGATCTAAATCTTAA

*Caadh*

ATGAAAGGTTTTGCAATGTTAGGTATTAACAAATTAGGATGGATTGAAAAGAA  
AAACCCAGTGCCAGGTCCTTATGATGCGATTGTACATCCTCTAGCTGTATCCCC  
ATGTACATCAGATATACATACGGTTTTTGAAAGGAGCACTTGTTAATAGGGAAA  
ATATGATTTTAGCCATGAAGCTGTAGGTGAAATAGCCGAAGTTGGCAGCGAA  
GTTAAAGATTTTAAAGTTGGCGATAGAGTTATCGTACCATGCACAACACCTGAC  
TGGAGATCTTTAGAAGTCCAAGCTGGTTTTACAGCAGCATTCAAACGGTATGCTT

---

GCAGGATGGAAGTTTTCCAATTTTAAAGATGGTGTATTTGCAGATTACTTTCATG  
TAAACGATGCAGATATGAATCTTGCCATACTCCCAGATGAAATACCTTTAGAA  
AGTGCAGTTATGATGACAGACATGATGACTACTGGTTTTTCATGGAGCAGAACTT  
GCAGACATAAAAAATGGGCTCCAGCGTTGTAGTAATTGGTATAGGAGCTGTTGG  
ATTAATGGGAATAGCCGGTTCCAAACTTCGAGGAGCAGGCAGAATTATCGGTG  
TTGGAAGCAGACCTGTTTGTGTTGAAACAGCTAAATTTTATGGAGCAACTGATA  
TTGTAAATTATAAAAAATGGTGATATAGTTGAACAAATCATGGACTTAACTCATG  
GTAAAGGTGTAGACCGTGTAATCATGGCAGGCGGTGGTGCTGAAACACTAGCA  
CAAGCAGTAACTATGGTTAAACCTGGCGGCGTAATTTCTAACATCAACTACCAT  
GGAAGCGGTGATACTTTACCAATACCTCGTGTTCAATGGGGCTGCGGCATGGCT  
CACAAAACCTATAAGAGGAGGATTATGCCCCGGCGGACGTCTTAGAATGGAAAT  
GCTAAGAGATCTTGTTCTATATAAACGTGTTGATTTGAGTAAACTTGTTACTCAT  
GTATTTGATGGTGCAGAAAATATTGAAAAGGCCCTTTTGCTTATGAAAAATAAG  
CCAAAAGATTTAATTAAATCAGTAGTTACATTCTAA

*Caadh:S199A*

ATGAAAGGTTTTGCAATGTTAGGTATTAACAAATTAGGATGGATTGAAAAGAA  
AAACCCAGTGCCAGGTCCTTATGATGCGATTGTACATCCTCTAGCTGTATCCCC  
ATGTACATCAGATATACATACGGTTTTTGAAGGAGCACTTGGTAATAGGGAAA  
ATATGATTTTAGGCCATGAAGCTGTAGGTGAAATAGCCGAAGTTGGCAGCGAA  
GTTAAAGATTTTAAAGTTGGCGATAGAGTTATCGTACCATGCACAACACCTGAC  
TGGAGATCTTTAGAAGTCCAAGCTGGTTTTTCAGCAGCATTCAAACGGTATGCTT  
GCAGGATGGAAGTTTTCCAATTTTAAAGATGGTGTATTTGCAGATTACTTTCATG  
TAAACGATGCAGATATGAATCTTGCCATACTCCCAGATGAAATACCTTTAGAA  
AGTGCAGTTATGATGACAGACATGATGACTACTGGTTTTTCATGGAGCAGAACTT  
GCAGACATAAAAAATGGGCTCCAGCGTTGTAGTAATTGGTATAGGAGCTGTTGG  
ATTAATGGGAATAGCCGGTTCCAAACTTCGAGGAGCAGGCAGAATTATCGGTG  
TTGGAAGCAGACCTGTTTGTGTTGAAACAGCTAAATTTTATGGAGCAACTGATA  
TTGTAAATTATAAAAAATGGTGATATAGTTGAACAAATCATGGACTTAACTCATG  
GTAAAGGTGTAGACCGTGTAATCATGGCAGGCGGTGGTGCTGAAACACTAGCA  
CAAGCAGTAACTATGGTTAAACCTGGCGGCGTAATTTCTAACATCAACTACCAT  
GGAAGCGGTGATACTTTACCAATACCTCGTGTTCAATGGGGCTGCGGCATGGCT  
CACAAAACCTATAAGAGGAGGATTATGCCCCGGCGGACGTCTTAGAATGGAAAT  
GCTAAGAGATCTTGTTCTATATAAACGTGTTGATTTGAGTAAACTTGTTACTCAT  
GTATTTGATGGTGCAGAAAATATTGAAAAGGCCCTTTTGCTTATGAAAAATAAG  
CCAAAAGATTTAATTAAATCAGTAGTTACATTCTAA

---

**Table 3S.** Kinetic parameters of (2*R*, 3*R*)-BDH and (2*S*, 3*S*)-BDH for 1,2-BD mixture.

| Kinetic parameters                                       | (2 <i>R</i> , 3 <i>R</i> )-BDH | (2 <i>S</i> , 3 <i>S</i> )-BDH |
|----------------------------------------------------------|--------------------------------|--------------------------------|
| $V_{\max}$ (U/mg)                                        | $23.18 \pm 0.17$               | $1.40 \pm 0.03$                |
| $K_m$ (mM)                                               | $0.97 \pm 0.07$                | $2.60 \pm 0.32$                |
| $K_{\text{cat}}$ (S <sup>-1</sup> )                      | $16.61 \pm 2.31$               | $0.70 \pm 0.12$                |
| $K_{\text{cat}}/K_m$ (S <sup>-1</sup> mM <sup>-1</sup> ) | $17.07 \pm 1.34$               | $0.27 \pm 0.01$                |

**Table S4.** Enzyme activities of the recombinant *E. coli* strains.

| <i>E. coli</i> strains | Enzyme activities of (2 <i>S</i> , 3 <i>S</i> )-BDH, (2 <i>R</i> , 3 <i>R</i> )-BDH and NOX (U/mg) |             |
|------------------------|----------------------------------------------------------------------------------------------------|-------------|
|                        | 1,2-BD mixture                                                                                     | NADH        |
| pET28a                 | 0                                                                                                  | ND          |
| pET-ssbdh              | 0.36 ± 0.01                                                                                        | ND          |
| pET-ssbdh-nox          | 0.25 ± 0.03                                                                                        | 2.02 ± 0.23 |
| pET-ssbdh-nox-vgb      | 0.23 ± 0.01                                                                                        | 2.60 ± 0.16 |
| pET-rrbdh              | 9.89 ± 0.31                                                                                        | ND          |
| pET-rrbdh-nox          | 9.02 ± 0.47                                                                                        | 2.49 ± 0.16 |
| pET-rrbdh-nox-vgb      | 9.07 ± 0.24                                                                                        | 2.58 ± 0.27 |

ND: not detected.

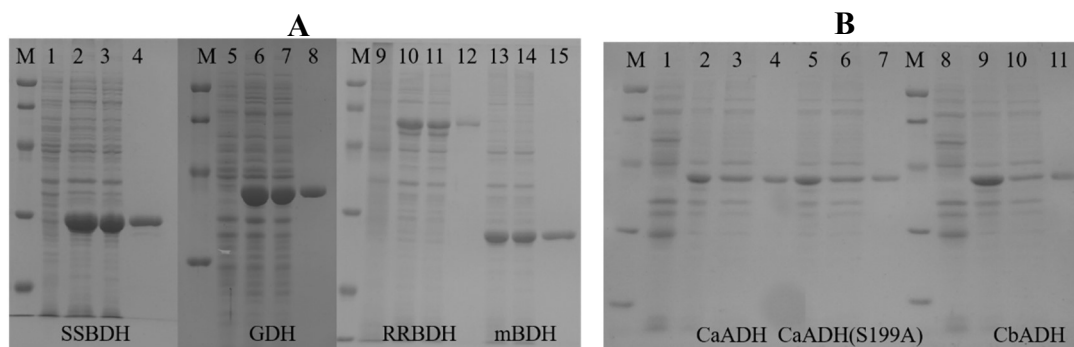

**Figure S1.** Analysis of expression and purification for SSBDH, GDH, RRBDH, mBDH (A), and CaADH, CaADH:S199A, CbADH (B) by SDS-PAGE. (A) Lane M, marker (97.2, 66.4, 44.3, 29, 20.01, 14.3 kDa); Lane 1-4, SSBDH (control, whole cell, soluble protein, and purified enzyme); Lane 5-8, GDH (whole cell, soluble protein, and purified enzyme); Lane 9-12, RRBDH (control, whole cell, soluble protein, and purified enzyme); Lane 13-15, mBDH (whole cell, soluble protein, and purified enzyme); (B) Lane M, marker (97.2, 66.4, 44.3, 29, 20.01, 14.3 kDa); Lane 1-4, CaADH, (control, whole cell, soluble protein, and purified enzyme); Lane 5-7, CaADH:S199A, (whole cell, soluble protein, and purified enzyme); Lane 8-11, CbADH (control, whole cell, soluble protein, and purified enzyme).



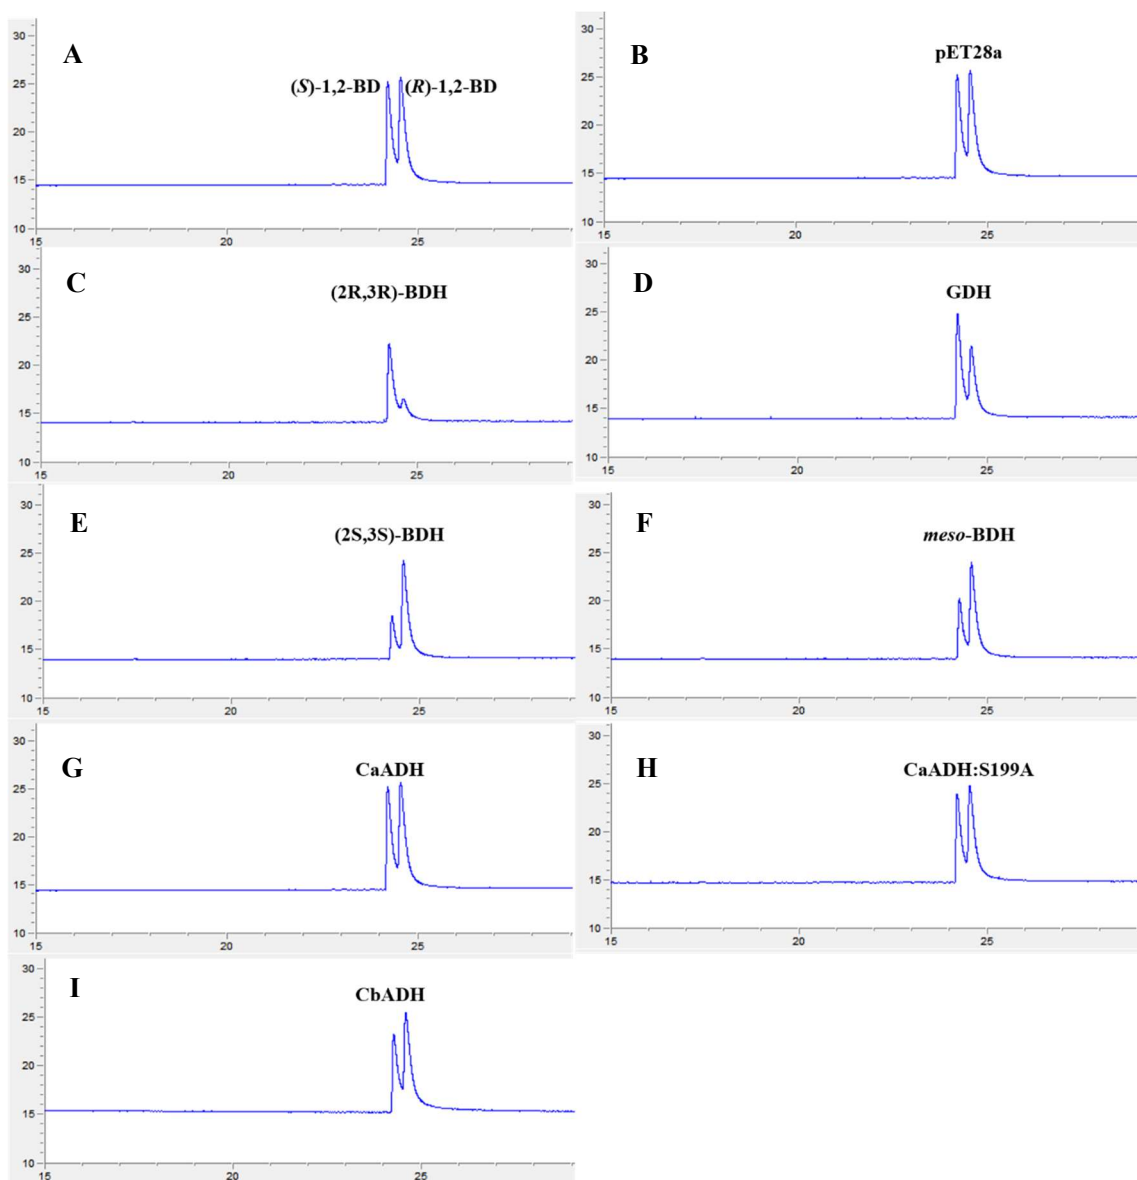

**Figure S2.** Chiral analysis of the product in the bioconversion reactions by whole cell biocatalysis. (A) Standard chemical; (B) *E. coli* (pET28a); (C) *E. coli* (pET-rrbhdh); (D) *E. coli* (pET-gdh); (E) *E. coli* (pET-ssbdh); (F) *E. coli* (pET-mbdh); (G) *E. coli* (pET-Caadh); (H) *E. coli* (pET-Caadh:S199A); (I) *E. coli* (pET-Cbadh).

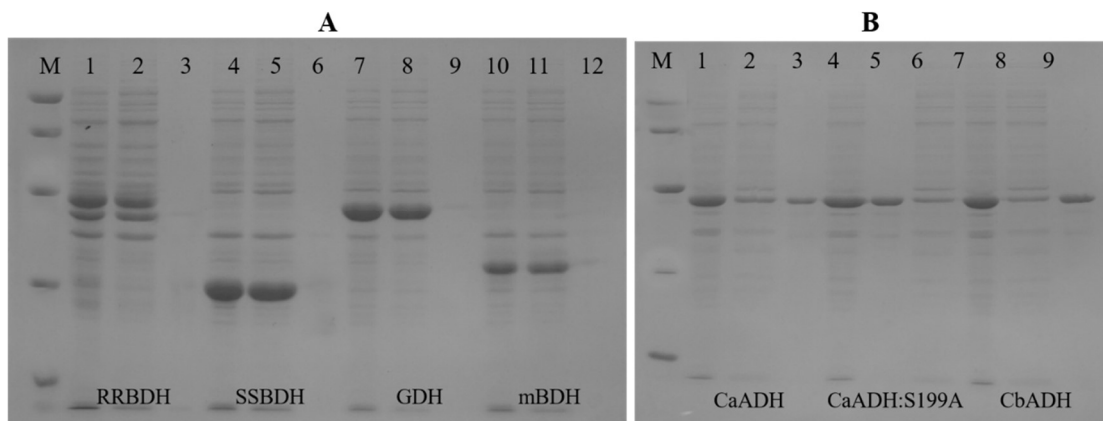

**Figure S3.** Analysis of expression level for RRBDH, SSBDH, GDH, mBDH, CaADH, CaADH:S199A, and CbADH in *E. coli* by SDS-PAGE. A: Lane M, marker (97.2, 66.4, 44.3, 29, 20.01, 14.3 kDa); Lane 1-3, RRBDH (whole cell, soluble protein, insoluble protein); Lane 4-6, SSBDH (whole cell, soluble protein, insoluble protein); Lane 7-9, GDH (whole cell, soluble protein, insoluble protein); Lane 10-12, mBDH, (whole cell, soluble protein, insoluble protein); B: Lane M, marker (97.2, 66.4, 44.3, 29, 20.01, 14.3 kDa); Lane 1-3, CaADH (whole cell, soluble protein, insoluble protein); Lane 4-6, CaADH:S199A (whole cell, soluble protein, insoluble protein); Lane 7-9, CbADH (whole cell, soluble protein, insoluble protein).

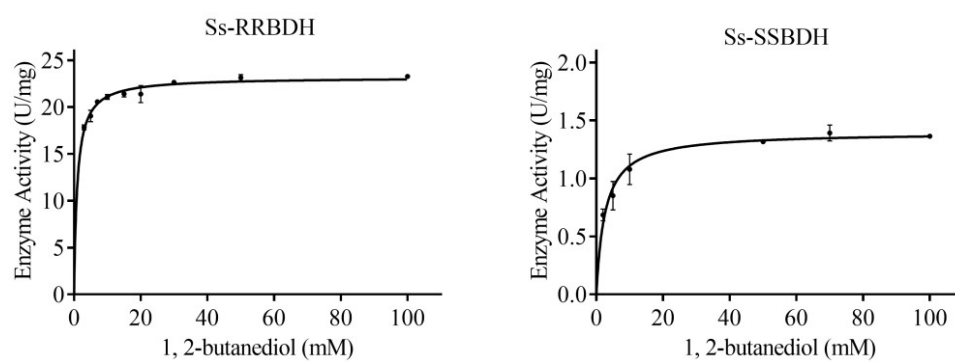

**Figure 4S.** Analysis of kinetic parameters for (2*R*, 3*R*)-BDH and (2*S*, 3*S*)-BDH using 1,2-BD mixture as substrate.

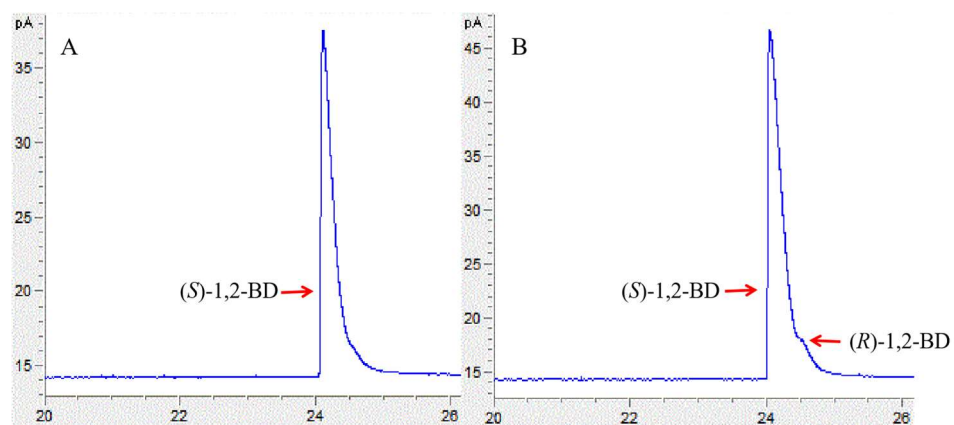

**Figure S5.** Chiral resolution of (S)-1,2-BD from 300 mM (A) and 400 mM (B) 1,2-BD mixture by *E. coli* (pET-rrbdh-nox-vgb).

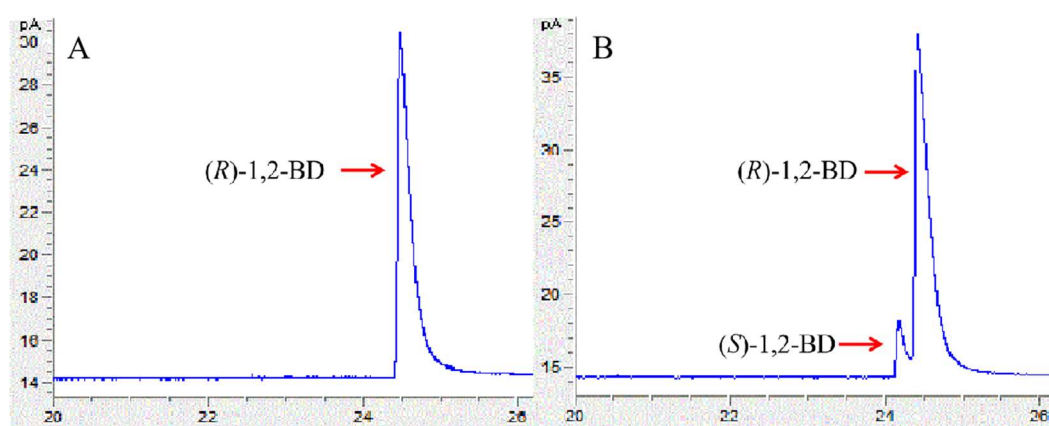

**Figure S6.** Chiral resolution of (*R*)-1,2-BD from 200 mM (A) and 300 mM (B) 1,2-BD mixture by *E. coli* (pET-*ssbdh-nox-vgb*).
